# Supplementary material for: Enhanced Weathering Using Basalt Rock Powder: Carbon Sequestration, Co-benefits and Risks in a Mesocosm Study With Solanum tuberosum
Source: Frontiers journal article supplement (doi:10.3389/fclim.2022.869456), 2022-05-17
Supplement: Table_2.DOCX [file Table_2.DOCX]

Supplementary Material 2

# PHREEQC code of model 1-3

Model 1 is identical to model 3 (which is published below), except for that Al(OH)3(a) is entered instead of Gibbsite in the equilibrium phase functionality and the augite block under the ‘RATES’ function is entered as below.

Augite

-start

10 REM Rate law froml Palandri and Kharaka (2004)

20 REM Affinity ON

30 moles = 0

40 IF(M <= 0 OR SI("Augite") > 0) THEN GOTO 270

50 rssa = PARM(1)

60 r_conc = PARM(2)

70 wporosity = PARM(3)

80 afrac = PARM(4)

90 a0 = rssa*r_conc*afrac/wporosity

100 v = PARM(5)

110 dif_temp = 1/TK-1/298.15

120 k_acid = 10^-6.82

130 eapp_acid = 78

140 n_acid = 0.7

150 k_neut = 10^-11.97

160 eapp_neut = 78.0

170 k_base = 0

180 eapp_base = 0

190 n_base = 0

200 hplus = MOL("H+")

210 r_acid = k_acid*EXP((-eapp_acid/8.314e-3)*dif_temp)*(hplus^n_acid)

220 r_neut = k_neut*EXP((-eapp_neut/8.314e-3)*dif_temp)

230 r_base = k_base*EXP((-eapp_base/8.314e-3)*dif_temp)*(hplus^n_base)

240 r_all = r_acid+r_neut+r_base

250 rate = (a0/v)*(M/M0)^0.67*r_all*(1-SR("Augite"))

260 moles = rate*TIME

270 SAVE moles

-end

## Model 2

Model 2 is identical to model 3 (which is published below), except for that Al(OH)3(a) is entered instead of Gibbsite in the equilibrium phase functionality.

## Model 3

TITLE Potato experiment

SOLUTION_MASTER_SPECIES

Ti Ti(OH)4 0.0 Ti 47.88

SOLUTION_SPECIES

Ti(OH)4 = Ti(OH)4

log_k 0

-delta_H 0

#(Blanc et al,, 2012);

PHASES

Augite

Ca0.9Mg0.9Na0.1Al0.4Fe0.2Si1.9Ti0.1O6 + 4H+ + 2H2O = 0.9Ca+2 + 0.9Mg+2 + 0.1Na+ + 0.4Al+3 + 0.2Fe+2 + 0.1Ti(OH)4 + 1.9H4SiO4 + 1.3 e-

log_k 19.894

delta_h -32.348 kcal

#source: supporting information tayler et al. 2016, log K & delta H of Diopside (CaMgSi2O6) as a proxy #(Ball & Nordstrom, 1991);

plagioclase # as labradorite

Ca0.5Na0.5Al1.5Si2.5O8 + 6.4H+ + 1.6H2O + 0.4OH- = 1.5Al+3 + 0.5Ca+2 + 2.5H4SiO4 + 0.5Na+

log_k 16.34

delta_h -213.1 kcal

olivine # as Forsterite

Mg1.04Fe0.96SiO4 + 4H+ = 0.96Fe+2 + H4SiO4 + 1.04Mg+2

log_k 28.306

delta_h -48.578 kcal

#(Ball & Nordstrom, 1991);

Illite

K0.6Mg0.25Al2.3Si3.5O10(OH)2 + 11.2H2O = 0.6K+ + 0.25Mg+2 + 2.3Al(OH)4- + 3.5H4SiO4 + 1.2H+

-log_k -40.267

-delta_h 54.684 kcal

-Vm 141.48

Chlorite(14A) #as clinochlore chlorite

Mg5Al2Si3O10(OH)8 + 16H+ = 5Mg+2 + 2Al+3 + 3H4SiO4 + 6H2O

-log_k 68.38

-delta_h -151.494 kcal

Magnesite #from core10.dat

MgCO3 + H+ = HCO3- + Mg+2

log_k 2.2936

-delta_H -44.4968 kJ/mol

# deltafH -265.63 kcal/mol

-analytic -1.6665e2 -4.9469e-2 6.4344e3 6.5506e1 1.0045e2

# Range 0-350

-Vm 28.018

# Extrapol supcrt92

# Ref HDN+78

Siderite

FeCO3 = Fe+2 + CO3-2

-log_k -10.89

-delta_h -2.480 kcal

-Vm 29.2

Nesquehonite #wateq4f.dat

MgCO3:3H2O = Mg+2 + CO3-2 + 3H2O

log_k -5.621

delta_h -5.789 kcal

Hydromagnesite #wateq4f.dat

Mg5(CO3)4(OH)2:4H2O + 2H+ = 5Mg+2 + 4CO3-2 + 6H2O

log_k -8.762

delta_h -52.244 kcal

Gibbsite

Al(OH)3 +3.0000 H+ = + 1.0000 Al+3 + 3.0000 H2O

log_k 7.7560

-delta_H -102.788 kJ/mol # Calculated enthalpy of reaction Gibbsite

# Enthalpy of formation: -309.065 kcal/mol

-analytic -1.1403e+002 -3.6453e-002 7.7236e+003 4.3134e+001 1.2055e+002

# -Range: 0-300

SELECTED_OUTPUT 1

-file potatoexperiment_basalt_model3.tsv

-totals N Na Ca Mg K Al Si Fe Mn Sr Ba

P C(4) Alkalinity Hfo_s Hfo_w

-molalities CaX2 KX MgX2 NaX FeX2 MnX2 SrX2 AlX3 BaX2

Hfo_wH2PO4 Hfo_wHPO4-

-equilibrium_phases Calcite SiO2(a) Gibbsite CO2(g) O2(g)

Goethite Kaolinite Fe(OH)3(a) Pyrolusite Plagioclase olivine Augite Magnesite Siderite Dolomite Nesquehonite Hydromagnesite

-saturation_indices Calcite SiO2(a) Gibbsite CO2(g) O2(g)

Fe(OH)3(a) Pyrolusite Plagioclase Olivine Augite Illite Chlorite(14A) Nesquehonite Hydromagnesite

-kinetic_reactants Pyrolusite Plagioclase olivine Augite Illite Chlorite(14A) Nesquehonite Hydromagnesite

USER_PUNCH 1

-headings SurfH_Ca SurfH_Mg SurfH_H Hfo_PO4

-start

10 PUNCH SURF("Ca","H") SURF("Mg","H") SURF("H","H") SURF("P","Hfo")

-end

#solutions

SOLUTION 0 Leachate for no-basalt planted control - simulates weathering of soil minerals and plant in no-basalt columns

temp 12

pH 7.64

pe 4

redox pe

units mg/l

density 1

Al 0.032

Ca 226.61

Fe 0.109

K 16.366

Mg 18.83

Cu 0.023

Mn 1.306

Na 48.61

Si 8.31

Zn 0.0309

N(3) 0.211

S(6) 441.321 #measured = 147.106 (mgS/L) *96g SO4/32 g S = 441.32

N(5) 1.705

P 0.138

Alkalinity 129 gfw 100 #as CaCO3 (mg/L) = 129 mgCaCO3/L (=2.57 meq/L(TA)*50 gCaCO3/eq)

-water 1 # kg

SOLUTION 1-20 Leachate for no-basalt planted control

temp 12

pH 7.64

pe 4

redox pe

units mg/l

density 1

Al 0.032

Ca 226.61

Fe 0.109

K 16.366

Mg 18.83

Cu 0.023

Mn 1.306

Na 48.61

Si 8.31

Zn 0.0309

N(3) 0.211

S(6) 441.321 #measured = 147.106 (mgS/L) *96g SO4/32 g S = 441.32

N(5) 1.705

P 0.138

Alkalinity 129 gfw 100 #as CaCO3 (mg/L) = 130 mgCaCO3/L (=2.57 meq/L(TA)*50 g/eq)

-water 1 # kg

#Our column lenght is 1 meter. Dividing this into cells of 5 cm, we get 20 cells, solutions and equilluibrium phases.

#CO2 increases with depth to 0.5m according to PCO2 based on respiration fluxes and fick's law and then remains constant up to 1m depth as in Nan et al;

#fix pe at 4

EQUILIBRIUM_PHASES 1 O2(g) -2; Calcite 0 0; SiO2(a) 0 0; Gibbsite 0 0; Pyrolusite 0 0; Fe(OH)3(a) 0 0; CO2(g) -2.80 10 ;Dolomite 0 0;Magnesite 0 0;Siderite 0 0 ; Nesquehonite 0 0; Hydromagnesite 0 0

EQUILIBRIUM_PHASES 2 O2(g) -2; Calcite 0 0; SiO2(a) 0 0; Gibbsite 0 0; Pyrolusite 0 0; Fe(OH)3(a) 0 0; CO2(g) -2.28 10;Dolomite 0 0;Magnesite 0 0;Siderite 0 0; Nesquehonite 0 0; Hydromagnesite 0 0

EQUILIBRIUM_PHASES 3 O2(g) -2; Calcite 0 0; SiO2(a) 0 0; Gibbsite 0 0; Pyrolusite 0 0; Fe(OH)3(a) 0 0; CO2(g) -2.05 10;Dolomite 0 0;Magnesite 0 0;Siderite 0 0; Nesquehonite 0 0; Hydromagnesite 0 0

EQUILIBRIUM_PHASES 4 O2(g) -2; Calcite 0 0; SiO2(a) 0 0; Gibbsite 0 0;Pyrolusite 0 0; Fe(OH)3(a) 0 0; CO2(g) -1.90 10;Dolomite 0 0;Magnesite 0 0;Siderite 0 0; Nesquehonite 0 0; Hydromagnesite 0 0

EQUILIBRIUM_PHASES 5 O2(g) -2; Calcite 0 0; SiO2(a) 0 0; Gibbsite 0 0; Pyrolusite 0 0; Fe(OH)3(a) 0 0; CO2(g) -1.79 10;Dolomite 0 0;Magnesite 0 0;Siderite 0 0; Nesquehonite 0 0; Hydromagnesite 0 0

EQUILIBRIUM_PHASES 6 O2(g) -2; Calcite 0 0; SiO2(a) 0 0; Gibbsite 0 0; Pyrolusite 0 0; Fe(OH)3(a) 0 0; CO2(g) -1.70 10;Dolomite 0 0;Magnesite 0 0;Siderite 0 0; Nesquehonite 0 0; Hydromagnesite 0 0

EQUILIBRIUM_PHASES 7 O2(g) -2; Calcite 0 0; SiO2(a) 0 0; Gibbsite 0 0; Pyrolusite 0 0; Fe(OH)3(a) 0 0; CO2(g) -1.63 10;Dolomite 0 0;Magnesite 0 0;Siderite 0 0; Nesquehonite 0 0; Hydromagnesite 0 0

EQUILIBRIUM_PHASES 8 O2(g) -2; Calcite 0 0; SiO2(a) 0 0; Gibbsite 0 0; Pyrolusite 0 0; Fe(OH)3(a) 0 0; CO2(g) -1.57 10;Dolomite 0 0;Magnesite 0 0;Siderite 0 0; Nesquehonite 0 0; Hydromagnesite 0 0

EQUILIBRIUM_PHASES 9 O2(g) -2; Calcite 0 0; SiO2(a) 0 0; Gibbsite 0 0; Pyrolusite 0 0; Fe(OH)3(a) 0 0; CO2(g) -1.51 10;Dolomite 0 0;Magnesite 0 0;Siderite 0 0; Nesquehonite 0 0; Hydromagnesite 0 0

EQUILIBRIUM_PHASES 10 O2(g) -2; Calcite 0 0; SiO2(a) 0 0; Gibbsite 0 0; Pyrolusite 0 0; Fe(OH)3(a) 0 0; CO2(g) -1.46 10;Dolomite 0 0;Magnesite 0 0;Siderite 0 0; Nesquehonite 0 0; Hydromagnesite 0 0

EQUILIBRIUM_PHASES 11 O2(g) -2; Calcite 0 0; SiO2(a) 0 0; Gibbsite 0 0; Pyrolusite 0 0; Fe(OH)3(a) 0 0; CO2(g) -1.46 10;Dolomite 0 0;Magnesite 0 0;Siderite 0 0; Nesquehonite 0 0; Hydromagnesite 0 0

EQUILIBRIUM_PHASES 12 O2(g) -2; Calcite 0 0; SiO2(a) 0 0;Gibbsite 0 0; Pyrolusite 0 0; Fe(OH)3(a) 0 0; CO2(g) -1.46 10;Dolomite 0 0;Magnesite 0 0;Siderite 0 0; Nesquehonite 0 0; Hydromagnesite 0 0

EQUILIBRIUM_PHASES 13 O2(g) -2; Calcite 0 0; SiO2(a) 0 0; Gibbsite 0 0; Pyrolusite 0 0; Fe(OH)3(a) 0 0; CO2(g) -1.46 10;Dolomite 0 0;Magnesite 0 0;Siderite 0 0; Nesquehonite 0 0; Hydromagnesite 0 0

EQUILIBRIUM_PHASES 14 O2(g) -2; Calcite 0 0; SiO2(a) 0 0; Gibbsite 0 0; Pyrolusite 0 0; Fe(OH)3(a) 0 0; CO2(g) -1.46 10;Dolomite 0 0;Magnesite 0 0;Siderite 0 0; Nesquehonite 0 0; Hydromagnesite 0 0

EQUILIBRIUM_PHASES 15 O2(g) -2 ; Calcite 0 0; SiO2(a) 0 0; Gibbsite 0 0; Pyrolusite 0 0; Fe(OH)3(a) 0 0; CO2(g) -1.46 10;Dolomite 0 0;Magnesite 0 0;Siderite 0 0; Nesquehonite 0 0; Hydromagnesite 0 0

EQUILIBRIUM_PHASES 16 O2(g) -2; Calcite 0 0; SiO2(a) 0 0; Gibbsite 0 0; Pyrolusite 0 0; Fe(OH)3(a) 0 0; CO2(g) -1.46 10;Dolomite 0 0;Magnesite 0 0;Siderite 0 0; Nesquehonite 0 0; Hydromagnesite 0 0

EQUILIBRIUM_PHASES 17 O2(g) -2; Calcite 0 0; SiO2(a) 0 0; Gibbsite 0 0; Pyrolusite 0 0; Fe(OH)3(a) 0 0; CO2(g) -1.46 10;Dolomite 0 0;Magnesite 0 0;Siderite 0 0; Nesquehonite 0 0; Hydromagnesite 0 0

EQUILIBRIUM_PHASES 18 O2(g) -2; Calcite 0 0; SiO2(a) 0 0; Gibbsite 0 0; Pyrolusite 0 0; Fe(OH)3(a) 0 0; CO2(g) -1.46 10;Dolomite 0 0;Magnesite 0 0;Siderite 0 0; Nesquehonite 0 0; Hydromagnesite 0 0

EQUILIBRIUM_PHASES 19 O2(g) -2; Calcite 0 0; SiO2(a) 0 0; Gibbsite 0 0; Pyrolusite 0 0; Fe(OH)3(a) 0 0; CO2(g) -1.46 10;Dolomite 0 0;Magnesite 0 0;Siderite 0 0; Nesquehonite 0 0; Hydromagnesite 0 0

EQUILIBRIUM_PHASES 20 O2(g) -2; Calcite 0 0; SiO2(a) 0 0; Gibbsite 0 0; Pyrolusite 0 0; Fe(OH)3(a) 0 0; CO2(g) -1.46 10;Dolomite 0 0;Magnesite 0 0;Siderite 0 0; Nesquehonite 0 0; Hydromagnesite 0 0

END

EXCHANGE 1-20

X 0.5216

# CEC in mol equivalents/ L_porewater 521.6 meq/Lpw

# CEC = 5.19 meq/100g soil * (10*100gsoil/kg soil)* 1.407 kg soil/L soil (=Bulkdensity) / (0.14L porewater/L soil) = 521.595 meq/L porewater

-equilibrate with solution 1

-pitzer_exchange_gammas true

END

SURFACE_MASTER_SPECIES

# Monodentate 60%

H_a H_aH; H_b H_bH; H_c H_cH; H_d H_dH

H_e H_eH; H_f H_fH; H_g H_gH; H_h H_hH

# Diprotic 40%

H_ab H_abH2; H_ad H_adH2; H_af H_afH2; H_ah H_ahH2

H_bc H_bcH2; H_be H_beH2; H_bg H_bgH2; H_cd H_cdH2

H_cf H_cfH2; H_ch H_chH2; H_de H_deH2; H_dg H_dgH2

SURFACE_SPECIES

H_aH = H_aH; log_k 0; H_bH = H_bH; log_k 0; H_cH = H_cH; log_k 0; H_dH = H_dH; log_k 0;

H_eH = H_eH; log_k 0; H_fH = H_fH; log_k 0; H_gH = H_gH; log_k 0; H_hH = H_hH; log_k 0;

H_abH2 = H_abH2; log_k 0; H_adH2 = H_adH2; log_k 0; H_afH2 = H_afH2; log_k 0;

H_ahH2 = H_ahH2; log_k 0; H_bcH2 = H_bcH2; log_k 0; H_beH2 = H_beH2; log_k 0;

H_bgH2 = H_bgH2; log_k 0; H_cdH2 = H_cdH2; log_k 0; H_cfH2 = H_cfH2; log_k 0;

H_chH2 = H_chH2; log_k 0; H_deH2 = H_deH2; log_k 0; H_dgH2 = H_dgH2; log_k 0;

# Protons

H_aH = H_a- + H+; log_k -1.59

H_bH = H_b- + H+; log_k -2.70

H_cH = H_c- + H+; log_k -3.82

H_dH = H_d- + H+; log_k -4.93

H_eH = H_e- + H+; log_k -6.88

H_fH = H_f- + H+; log_k -8.72

H_gH = H_g- + H+; log_k -10.56

H_hH = H_h- + H+; log_k -12.40

H_abH2 = H_abH- + H+; log_k -1.59; H_abH- = H_ab-2 + H+; log_k -2.70

H_adH2 = H_adH- + H+; log_k -1.59; H_adH- = H_ad-2 + H+; log_k -4.93

H_afH2 = H_afH- + H+; log_k -1.59; H_afH- = H_af-2 + H+; log_k -8.72

H_ahH2 = H_ahH- + H+; log_k -1.59; H_ahH- = H_ah-2 + H+; log_k -12.40

H_bcH2 = H_bcH- + H+; log_k -2.70; H_bcH- = H_bc-2 + H+; log_k -3.82

H_beH2 = H_beH- + H+; log_k -2.70; H_beH- = H_be-2 + H+; log_k -6.88

H_bgH2 = H_bgH- + H+; log_k -2.70; H_bgH- = H_bg-2 + H+; log_k -10.56

H_cdH2 = H_cdH- + H+; log_k -3.82; H_cdH- = H_cd-2 + H+; log_k -4.93

H_cfH2 = H_cfH- + H+; log_k -3.82; H_cfH- = H_cf-2 + H+; log_k -8.72

H_chH2 = H_chH- + H+; log_k -3.82; H_chH- = H_ch-2 + H+; log_k -12.40

H_deH2 = H_deH- + H+; log_k -4.93; H_deH- = H_de-2 + H+; log_k -6.88

H_dgH2 = H_dgH- + H+; log_k -4.93; H_dgH- = H_dg-2 + H+; log_k -10.56

# Mg From Lofts and Tipping, 2000

H_aH + Mg+2 = H_aMg+ + H+; log_k -3.30

H_bH + Mg+2 = H_bMg+ + H+; log_k -3.30

H_cH + Mg+2 = H_cMg+ + H+; log_k -3.30

H_dH + Mg+2 = H_dMg+ + H+; log_k -3.30

H_eH + Mg+2 = H_eMg+ + H+; log_k -7.12

H_fH + Mg+2 = H_fMg+ + H+; log_k -7.12

H_gH + Mg+2 = H_gMg+ + H+; log_k -7.12

H_hH + Mg+2 = H_hMg+ + H+; log_k -7.12

H_abH2 + Mg+2 = H_abMg + 2H+; log_k -6.60

H_adH2 + Mg+2 = H_adMg + 2H+; log_k -6.60

H_afH2 + Mg+2 = H_afMg + 2H+; log_k -10.42

H_ahH2 + Mg+2 = H_ahMg + 2H+; log_k -10.42

H_bcH2 + Mg+2 = H_bcMg + 2H+; log_k -6.60

H_beH2 + Mg+2 = H_beMg + 2H+; log_k -10.42

H_bgH2 + Mg+2 = H_bgMg + 2H+; log_k -10.42

H_cdH2 + Mg+2 = H_cdMg + 2H+; log_k -6.60

H_cfH2 + Mg+2 = H_cfMg + 2H+; log_k -10.42

H_chH2 + Mg+2 = H_chMg + 2H+; log_k -10.42

H_deH2 + Mg+2 = H_deMg + 2H+; log_k -10.42

H_dgH2 + Mg+2 = H_dgMg + 2H+; log_k -10.42

# Calcium, Lofts and Tipping, 2000

H_aH + Ca+2 = H_aCa+ + H+; log_k -3.20

H_bH + Ca+2 = H_bCa+ + H+; log_k -3.20

H_cH + Ca+2 = H_cCa+ + H+; log_k -3.20

H_dH + Ca+2 = H_dCa+ + H+; log_k -3.20

H_eH + Ca+2 = H_eCa+ + H+; log_k -6.99

H_fH + Ca+2 = H_fCa+ + H+; log_k -6.99

H_gH + Ca+2 = H_gCa+ + H+; log_k -6.99

H_hH + Ca+2 = H_hCa+ + H+; log_k -6.99

H_abH2 + Ca+2 = H_abCa + 2H+; log_k -6.40

H_adH2 + Ca+2 = H_adCa + 2H+; log_k -6.40

H_afH2 + Ca+2 = H_afCa + 2H+; log_k -7.45

H_ahH2 + Ca+2 = H_ahCa + 2H+; log_k -10.2

H_bcH2 + Ca+2 = H_bcCa + 2H+; log_k -6.40

H_beH2 + Ca+2 = H_beCa + 2H+; log_k -10.2

H_bgH2 + Ca+2 = H_bgCa + 2H+; log_k -10.2

H_cdH2 + Ca+2 = H_cdCa + 2H+; log_k -6.40

H_cfH2 + Ca+2 = H_cfCa + 2H+; log_k -10.2

H_chH2 + Ca+2 = H_chCa + 2H+; log_k -10.2

H_deH2 + Ca+2 = H_deCa + 2H+; log_k -10.2

H_dgH2 + Ca+2 = H_dgCa + 2H+; log_k -10.2

# Copper

H_aH + Cu+2 = H_aCu+ + H+; log_k -0.63

H_bH + Cu+2 = H_bCu+ + H+; log_k -0.63

H_cH + Cu+2 = H_cCu+ + H+; log_k -0.63

H_dH + Cu+2 = H_dCu+ + H+; log_k -0.63

H_eH + Cu+2 = H_eCu+ + H+; log_k -3.75

H_fH + Cu+2 = H_fCu+ + H+; log_k -3.75

H_gH + Cu+2 = H_gCu+ + H+; log_k -3.75

H_hH + Cu+2 = H_hCu+ + H+; log_k -3.75

H_abH2 + Cu+2 = H_abCu + 2H+; log_k -1.26

H_adH2 + Cu+2 = H_adCu + 2H+; log_k -1.26

H_afH2 + Cu+2 = H_afCu + 2H+; log_k -4.38

H_ahH2 + Cu+2 = H_ahCu + 2H+; log_k -4.38

H_bcH2 + Cu+2 = H_bcCu + 2H+; log_k -1.26

H_beH2 + Cu+2 = H_beCu + 2H+; log_k -4.38

H_bgH2 + Cu+2 = H_bgCu + 2H+; log_k -4.38

H_cdH2 + Cu+2 = H_cdCu + 2H+; log_k -1.26

H_cfH2 + Cu+2 = H_cfCu + 2H+; log_k -4.38

H_chH2 + Cu+2 = H_chCu + 2H+; log_k -4.38

H_deH2 + Cu+2 = H_deCu + 2H+; log_k -4.38

H_dgH2 + Cu+2 = H_dgCu + 2H+; log_k -4.38

# Zinc

H_aH + Zn+2 = H_aZn+ + H+; log_k -1.7

H_bH + Zn+2 = H_bZn+ + H+; log_k -1.7

H_cH + Zn+2 = H_cZn+ + H+; log_k -1.7

H_dH + Zn+2 = H_dZn+ + H+; log_k -1.7

H_eH + Zn+2 = H_eZn+ + H+; log_k -4.9

H_fH + Zn+2 = H_fZn+ + H+; log_k -4.9

H_gH + Zn+2 = H_gZn+ + H+; log_k -4.9

H_hH + Zn+2 = H_hZn+ + H+; log_k -4.9

H_abH2 + Zn+2 = H_abZn + 2H+; log_k -2.4

H_adH2 + Zn+2 = H_adZn + 2H+; log_k -2.4

H_afH2 + Zn+2 = H_afZn + 2H+; log_k -6.6

H_ahH2 + Zn+2 = H_ahZn + 2H+; log_k -6.6

H_bcH2 + Zn+2 = H_bcZn + 2H+; log_k -2.4

H_beH2 + Zn+2 = H_beZn + 2H+; log_k -6.6

H_bgH2 + Zn+2 = H_bgZn + 2H+; log_k -6.6

H_cdH2 + Zn+2 = H_cdZn + 2H+; log_k -2.4

H_cfH2 + Zn+2 = H_cfZn + 2H+; log_k -6.6

H_chH2 + Zn+2 = H_chZn + 2H+; log_k -6.6

H_deH2 + Zn+2 = H_deZn + 2H+; log_k -6.6

H_dgH2 + Zn+2 = H_dgZn + 2H+; log_k -6.6

# Cadmium

H_aH + Cd+2 = H_aCd+ + H+; log_k -1.52

H_bH + Cd+2 = H_bCd+ + H+; log_k -1.52

H_cH + Cd+2 = H_cCd+ + H+; log_k -1.52

H_dH + Cd+2 = H_dCd+ + H+; log_k -1.52

H_eH + Cd+2 = H_eCd+ + H+; log_k -5.57

H_fH + Cd+2 = H_fCd+ + H+; log_k -5.57

H_gH + Cd+2 = H_gCd+ + H+; log_k -5.57

H_hH + Cd+2 = H_hCd+ + H+; log_k -5.57

H_abH2 + Cd+2 = H_abCd + 2H+; log_k -3.04

H_adH2 + Cd+2 = H_adCd + 2H+; log_k -3.04

H_afH2 + Cd+2 = H_afCd + 2H+; log_k -7.09

H_ahH2 + Cd+2 = H_ahCd + 2H+; log_k -7.09

H_bcH2 + Cd+2 = H_bcCd + 2H+; log_k -3.04

H_beH2 + Cd+2 = H_beCd + 2H+; log_k -7.09

H_bgH2 + Cd+2 = H_bgCd + 2H+; log_k -7.09

H_cdH2 + Cd+2 = H_cdCd + 2H+; log_k -3.04

H_cfH2 + Cd+2 = H_cfCd + 2H+; log_k -7.09

H_chH2 + Cd+2 = H_chCd + 2H+; log_k -7.09

H_deH2 + Cd+2 = H_deCd + 2H+; log_k -7.09

H_dgH2 + Cd+2 = H_dgCd + 2H+; log_k -7.09

# Plumbum (Lead)

H_aH + Pb+2 = H_aPb+ + H+; log_k -0.81

H_bH + Pb+2 = H_bPb+ + H+; log_k -0.81

H_cH + Pb+2 = H_cPb+ + H+; log_k -0.81

H_dH + Pb+2 = H_dPb+ + H+; log_k -0.81

H_eH + Pb+2 = H_ePb+ + H+; log_k -3.04

H_fH + Pb+2 = H_fPb+ + H+; log_k -3.04

H_gH + Pb+2 = H_gPb+ + H+; log_k -3.04

H_hH + Pb+2 = H_hPb+ + H+; log_k -3.04

H_abH2 + Pb+2 = H_abPb + 2H+; log_k -1.62

H_adH2 + Pb+2 = H_adPb + 2H+; log_k -1.62

H_afH2 + Pb+2 = H_afPb + 2H+; log_k -3.85

H_ahH2 + Pb+2 = H_ahPb + 2H+; log_k -3.85

H_bcH2 + Pb+2 = H_bcPb + 2H+; log_k -1.62

H_beH2 + Pb+2 = H_bePb + 2H+; log_k -3.85

H_bgH2 + Pb+2 = H_bgPb + 2H+; log_k -3.85

H_cdH2 + Pb+2 = H_cdPb + 2H+; log_k -1.62

H_cfH2 + Pb+2 = H_cfPb + 2H+; log_k -3.85

H_chH2 + Pb+2 = H_chPb + 2H+; log_k -3.85

H_deH2 + Pb+2 = H_dePb + 2H+; log_k -3.85

H_dgH2 + Pb+2 = H_dgPb + 2H+; log_k -3.85

END

# Surface constants are taken from Appelo and Postma (2005)

SURFACE 1-20 # H is the ensemble of exchangeable sites on the particulate organic carbon in the soil (Soil_C_Org (0.831%)).

H_a 0.05930 4.65E+04 83.516 # Total concentration of sites (moles/L_porewater), OC specific surface area (m2/g), Total mass concentration OC (g/L_porewater)

# g/L pw = g orgC/g soil * g soil/ mL soil * ml soil/ ml Pw * 1000 mL pw /L pw = 0.00831 *1.407/0.14* 1000=83.516

#H_a ==> H_d: carboxylic sites

#H_e ==> H_h: fenolic sites of humic acids

H_b 0.05930; H_c 0.05930, H_d 0.05930

H_e 0.02964; H_f 0.02964, H_g 0.02964, H_h 0.02964

H_ab 0.00985; H_ad 0.00985, H_af 0.00985, H_ah 0.00985

H_bc 0.00985; H_be 0.00985, H_bg 0.00985, H_cd 0.00985

H_cf 0.00985; H_ch 0.00985, H_de 0.00985, H_dg 0.00985

-Donnan

# source HFO Kelland et al (2020): HFO is from the National Soil Inventory - 4.05% - Measured by ICP of an aqua regia digest

#600 m2/g ==> pg 341 Apello and postma 2005

# g/L pw = 0.0405 g HFO/g soil * 1.407 g soil/ mL soil * 1000 ml soil/ L soil / 0.14 Lpw/Lsoil = 0.0405 *1.407/0.14* 1000= 407.025 gHFO/L pw

#number of sites (mol) ==> 407.025 g FeOOH/89 g/mol *0.2 mol Hfo_w/mol HFO = 0.914 mol HFO_w

Hfo_w 0.914 600 407.025 # Total number of sites (moles/L_porewater), HFO specific surface area (m2/g), Total mass HFO (g/L pw)

Hfo_s 0.0228 #2.5% of HFO_weak sites are strong sites

-equilibrate 1

END

RATES

Augite

-start

10 REM Rate law from Palandri and Kharaka (2004)

20 REM Affinity ON

30 moles = 0

40 IF(M <= 0 OR SI("Augite") > 0) THEN GOTO 270

50 rssa = PARM(1)

60 r_conc = PARM(2)

70 wporosity = PARM(3)

80 afrac = PARM(4)

90 a0 = rssa*r_conc*afrac/wporosity

100 v = PARM(5)

110 dif_temp = 1/TK-1/298.15

120 k_acid = 2.88*10^(-10)

200 hplus = MOL("H+")

210 r_acid = k_acid*(hplus^0.18)*EXP((-78/8.314e-3)*dif_temp)

240 r_all = r_acid

250 rate = (a0/v)*(M/M0)^0.67*r_all*(1-SR("Augite"))

260 moles = rate*TIME

270 SAVE moles

-end

Plagioclase # labradorite

-start

10 REM Rate law from Palandri and Kharaka (2004)

20 REM Affinity ON

30 moles = 0

40 IF(M <= 0 OR SI("Plagioclase") > 0) THEN GOTO 270

50 rssa = PARM(1)

60 r_conc = PARM(2)

70 wporosity = PARM(3)

80 afrac = PARM(4)

90 a0 = rssa*r_conc*afrac/wporosity

100 v = PARM(5)

110 dif_temp = 1/TK-1/298.15

120 k_acid = 10^-7.87

130 eapp_acid = 42.1

140 n_acid = 0.626

150 k_neut = 10^-10.91

160 eapp_neut = 45.2

170 k_base = 4*10^-15.6

180 eapp_base = 71

190 n_base = -0.572

200 hplus = MOL("H+")

210 r_acid = k_acid*EXP((-eapp_acid/8.314e-3)*dif_temp)*(hplus^n_acid)

220 r_neut = k_neut*EXP((-eapp_neut/8.314e-3)*dif_temp)

230 r_base = k_base*EXP((-eapp_base/8.314e-3)*dif_temp)

240 r_all = r_acid+r_neut+r_base

250 rate = (a0/v)*(M/M0)^0.67*r_all*(1-SR("Plagioclase"))

260 moles = rate*TIME

270 SAVE moles

-end

Olivine # Forsterite

-start

10 REM Rate law from Palandri and Kharaka (2004)

20 REM Affinity ON

30 moles = 0

40 IF(M <= 0 OR SI("Olivine") > 0) THEN GOTO 270

50 rssa = PARM(1)

60 r_conc = PARM(2)

70 wporosity = PARM(3)

80 afrac = PARM(4)

90 a0 = rssa*r_conc*afrac/wporosity

100 v = PARM(5)

110 dif_temp = 1/TK-1/298.15

120 k_acid = 10^-6.85

130 eapp_acid = 67.2

140 n_acid = 0.47

150 k_neut = 10^-10.64

160 eapp_neut = 79

170 k_base = 0

180 eapp_base = 0

190 n_base = 0

200 hplus = MOL("H+")

210 r_acid = k_acid*EXP((-eapp_acid/8.314e-3)*dif_temp)*(hplus^n_acid)

220 r_neut = k_neut*EXP((-eapp_neut/8.314e-3)*dif_temp)

230 r_base = k_base*EXP((-eapp_base/8.314e-3)*dif_temp)*(hplus^n_base)

240 r_all = r_acid+r_neut+r_base

250 rate = (a0/v)*(M/M0)^0.67*r_all*(1-SR("Olivine"))

260 moles = rate*TIME

270 SAVE moles

-end

# Illite -> Neglected as kinetics lack and clay mineral illite will have a small influence on overall weathering and could not be found

# -start

# 10 REM Rate law from Palandri and Kharaka (2004)

# 20 REM Affinity ON

# 30 moles = 0

# 40 IF(M <= 0 OR SI("Illite") > 0) THEN GOTO 270

# 50 rssa = PARM(1)

# 60 r_conc = PARM(2)

# 70 wporosity = PARM(3)

# 80 afrac = PARM(4)

# 90 a0 = rssa*r_conc*afrac/wporosity

# 100 v = PARM(5)

# 110 dif_temp = 1/TK-1/298.15

# # 120 k_acid = 10^-12.71

# # 130 eapp_acid = 48

# # 140 n_acid = 0.22

# # 150 k_neut = 10^-14.41

# # 160 eapp_neut = 48

# # 170 k_base = 10^-14.41

# # 180 eapp_base = 48

# # 190 n_base = -0.13

# 200 hplus = MOL("H+")

# 210 r_acid = k_acid*EXP((-eapp_acid/8.314e-3)*dif_temp)*(hplus^n_acid)

# 220 r_neut = k_neut*EXP((-eapp_neut/8.314e-3)*dif_temp)

# 230 r_base = k_base*EXP((-eapp_base/8.314e-3)*dif_temp)*(hplus^n_base)

# 240 r_all = r_acid+r_neut+r_base

# 250 rate = (a0/v)*(M/M0)^0.67*r_all*(1-SR("Illite"))

# 260 moles = rate*TIME

# 270 SAVE moles

# -end

Chlorite(14A) # Chlorite

-start

10 REM Rate law from Palandri and Kharaka (2004)

20 REM Affinity ON

30 moles = 0

40 IF(M <= 0 OR SI("Chlorite(14A)") > 0) THEN GOTO 270A

50 rssa = PARM(1)

60 r_conc = PARM(2)

70 wporosity = PARM(3)

80 afrac = PARM(4)

90 a0 = rssa*r_conc*afrac/wporosity

100 v = PARM(5)

110 dif_temp = 1/TK-1/298.15

120 k_acid = 10^-11.11

130 eapp_acid = 88.0

140 n_acid = 0.5

150 k_neut = 10^-12.52

160 eapp_neut = 88

170 k_base = 10^-21.2

180 eapp_base = 0

190 n_base = 0

200 hplus = MOL("H+")

210 r_acid = k_acid*EXP((-eapp_acid/8.314e-3)*dif_temp)*(hplus^n_acid)

220 r_neut = k_neut*EXP((-eapp_neut/8.314e-3)*dif_temp)

230 r_base = k_base*EXP((-eapp_base/8.314e-3)*dif_temp)*(hplus^n_base)

240 r_all = r_acid+r_neut+r_base

250 rate = (a0/v)*(M/M0)^0.67*r_all*(1-SR("Chlorite(14A)"))

260 moles = rate*TIME

270 SAVE moles

-end

INCREMENTAL_REACTIONS true

KINETICS 1-4

# Parameters for the minerals

Augite

-formula Ca0.9Mg0.9Na0.1Al0.4Fe0.2Si1.9Ti0.1O6 1

-m 0.26443 # moles per litre pores

-m0 0.26443

-parms 9.226 25 0.14 0.38173 1.0 # Rock specific surface area (m2_rock/g_rock); rock conc in soil (g_rock/L_soil) # water-filled porosity; mineral area fraction in rock (m2_minrl/m2_rock); volume pore water (L)

-tol 1e-008

Plagioclase # labradorite

-formula Ca0.5Na0.5Al1.5Si2.5O8 1

-m 0.16190 # moles per litre pores

-m0 0.16190

-parms 9.226 25 0.14 0.34837 1.0 # Rock specific surface area (m2_rock/g_rock); rock conc in soil (g_rock/L_soil)

# water-filled porosity; mineral area fraction in rock (m2_minrl/m2_rock); volume pore water (L)

-tol 1e-008

Olivine # Forsterite

-formula Mg1.04Fe0.96SiO4 1

-m 0.03656 # moles per litre pores

-m0 0.03656

-parms 9.226 25 0.14 0.08475 1.0 # Rock specific surface area (m2_rock/g_rock); rock conc in soil (g_rock/L_soil)

# water-filled porosity; mineral area fraction in rock (m2_minrl/m2_rock); volume pore water (L)

-tol 1e-008

#illite is excluded as no good thermodynamical data was found and contribution to weathering is expected to be limited

Chlorite(14A) # Chlorite

-formula Mg5Al2Si3O10(OH)8 1

-m 0.01125 # moles per litre pores

-m0 0.01125

-parms 9.226 25 0.14 0.09041 1.0 # Rock specific surface area (m2_rock/g_rock); rock conc in soil (g_rock/L_soil)

# water-filled porosity; mineral area fraction in rock (m2_minrl/m2_rock); volume pore water (L)

-cvode true

-cvode_order 5

-cvode_steps 100

TRANSPORT

-cells 20

-shifts 102 # shifts for 5 years

-time_step 1544667.984 # seconds/cell

-lengths 20*0.05

-dispersivities 20*0

-print_cells 4 # Last basalt-containing cell

-punch_cells 1-20
